# Supplementary material for: Fecal Microbiota Transplantation Reduces Campylobacter jejuni Colonization in Young Broiler Chickens Challenged by Oral Gavage but Not by Seeder Birds
Source: MDPI journal article supplement (doi:10.3390/antibiotics12101503), 2023-10-02
Supplement: s1 [file s1]

## Supplementary materials

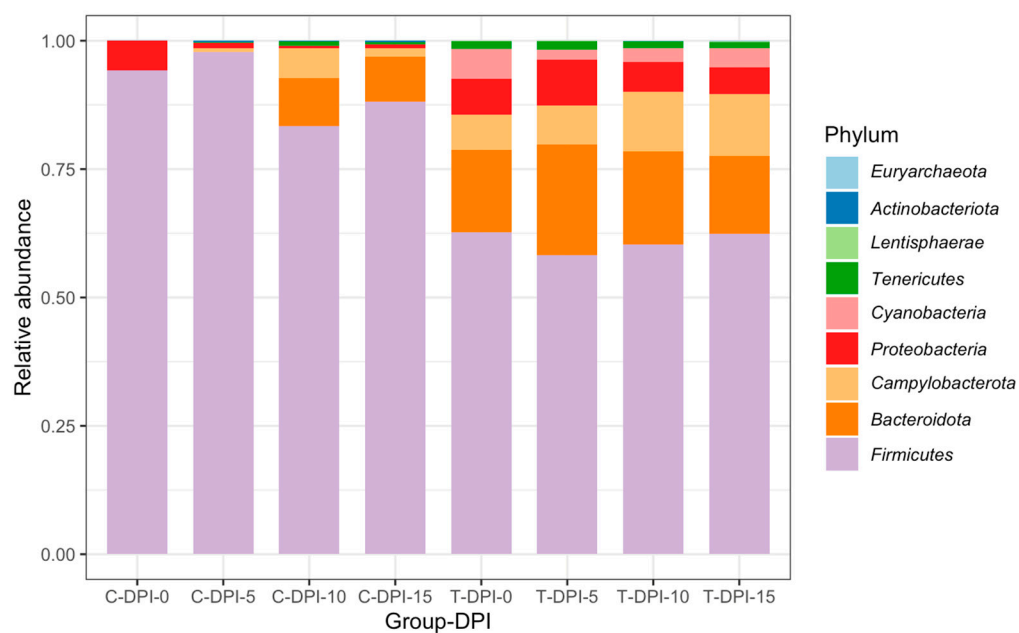

**Figure S1.** Stacked bar-plot representations of the main taxa's relative abundances at the phylum level for FMT trial 1, grouped by treatment status (C: Control; T: FMT) and sampling time (DPI-0, 5, 10, 15).

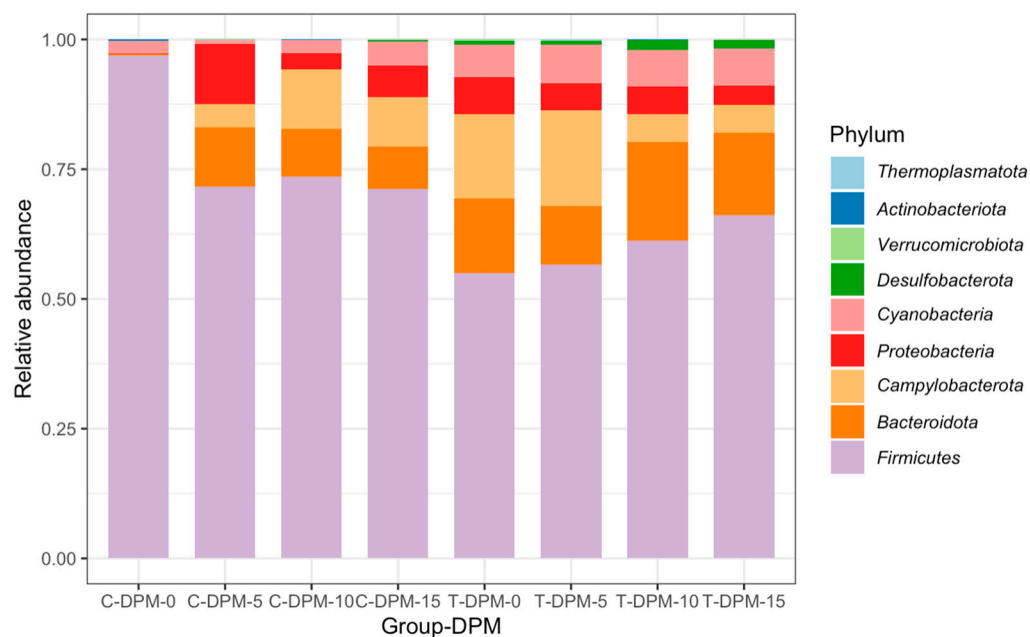

**Figure S2.** Stacked bar-plot representations of the main taxa's relative abundances at the phylum level for FMT trial 2, grouped by treatment status (C: Control; T: FMT) and sampling time (DPM-0, 5, 10, 15).

**Table S1.** Taxonomic relative abundances of the control and FMT groups at the phylum level for FMT trial 1.

| Phylum                  | Control | FMT     |
|-------------------------|---------|---------|
| <i>Firmicutes</i>       | 90.630% | 60.760% |
| <i>Bacteroidota</i>     | 4.849%  | 17.850% |
| <i>Campylobacterota</i> | 2.162%  | 9.891%  |
| <i>Proteobacteria</i>   | 1.796%  | 6.571%  |
| <i>Tenericutes</i>      | 0.378%  | 1.385%  |
| <i>Actinobacteriota</i> | 0.183%  | 0.014%  |
| <i>Euryarchaeota</i>    | 0.000%  | 0.071%  |
| <i>Cyanobacteria</i>    | 0.000%  | 3.393%  |
| <i>Lentisphaerae</i>    | 0.000%  | 0.067%  |

**Table S2.** Taxonomic relative abundances of the control and FMT groups at the phylum level for FMT trial 2.

| Phylum                   | Control | FMT     |
|--------------------------|---------|---------|
| <i>Firmicutes</i>        | 77.835% | 60.172% |
| <i>Bacteroidota</i>      | 7.442%  | 15.409% |
| <i>Campylobacterota</i>  | 6.524%  | 10.704% |
| <i>Cyanobacteria</i>     | 5.386%  | 5.261%  |
| <i>Proteobacteria</i>    | 2.621%  | 6.936%  |
| <i>Desulfobacterota</i>  | 0.067%  | 1.358%  |
| <i>Verrucomicrobiota</i> | 0.031%  | 0.108%  |
| <i>Actinobacteriota</i>  | 0.094%  | 0.024%  |
| <i>Thermoplasmatota</i>  | 0.000%  | 0.028%  |

**Table S3.** Top ten abundant genera of the control and FMT groups for FMT trial 1.

| Rank | Control                                         | FMT                                             |
|------|-------------------------------------------------|-------------------------------------------------|
| 1    | <i>Lachnospiraceae</i> (f)-16.21%               | <i>Bacteroides</i> -9.63%                       |
| 2    | <i>Lactobacillus</i> -8.62%                     | <i>Helicobacter</i> -7.79%                      |
| 3    | <i>Clostridiales_vadinBB60_group</i> (un)-5.54% | <i>Faecalibacterium</i> -6.60%                  |
| 4    | <i>Ruminococcaceae_UCG.005</i> -5.44%           | <i>Lachnospiraceae</i> (f)-6.36%                |
| 5    | <i>Alistipes</i> -4.84%                         | <i>Lactobacillus</i> -4.59%                     |
| 6    | <i>Ruminococcus.torques_group</i> -4.50%        | <i>Clostridiales_vadinBB60_group</i> (un)-4.32% |
| 7    | <i>Ruminiclostridium_5</i> -4.40%               | <i>Ruminococcaceae_UCG.005</i> -3.79%           |
| 8    | <i>Clostridiales_vadinBB60_group</i> (f)-3.38%  | <i>Ruminococcus.torques_group</i> -3.55%        |
| 9    | <i>Faecalibacterium</i> -3.25%                  | <i>Alistipes</i> -3.38%                         |
| 10   | <i>Ruminococcaceae</i> (f)-2.86%                | <i>Parabacteroides</i> -3.34%                   |

**Table S4.** Top ten abundant genera of the control and FMT groups for FMT trial 2.

| Rank | Control                                   | FMT                                       |
|------|-------------------------------------------|-------------------------------------------|
| 1    | <i>Clostridia_vadinBB60_group</i> -10.79% | <i>Helicobacter</i> -10.35%               |
| 2    | <i>Lachnospiraceae(f)</i> -8.69%          | <i>Bacteroides</i> -9.60%                 |
| 3    | <i>Ruminococcus.torques_group</i> -7.82%  | <i>Clostridia_vadinBB60_group</i> -9.29%  |
| 4    | <i>Faecalibacterium</i> -6.53%            | <i>Ruminococcus._torques_group</i> -6.20% |
| 5    | <i>Helicobacter</i> -5.79%                | <i>Lachnospiraceae(f)</i> -5.65%          |
| 6    | <i>Gastranaerophilales</i> -5.39%         | <i>Gastranaerophilales</i> -5.26%         |
| 7    | <i>Lactobacillus</i> -5.17%               | UCG.005-4.26%                             |
| 8    | <i>Bacteroides</i> -5.12%                 | <i>Faecalibacterium</i> -3.94%            |
| 9    | UCG.005-4.14%                             | <i>Lactobacillus</i> -3.92%               |
| 10   | <i>Ruminococcaceae(f)</i> -2.71%          | <i>Clostridia_UCG.014</i> -3.60%          |

**Table S5.** Taxonomic relative abundances of the FMT inoculum at the phylum level.

| Rank | Phylum                   | Relative abundance |
|------|--------------------------|--------------------|
| 1    | <i>Firmicutes</i>        | 80.255%            |
| 2    | <i>Bacteroidota</i>      | 14.702%            |
| 3    | <i>Cyanobacteria</i>     | 2.769%             |
| 4    | <i>Proteobacteria</i>    | 0.975%             |
| 5    | <i>Actinobacteriota</i>  | 0.734%             |
| 6    | <i>Desulfobacterota</i>  | 0.415%             |
| 7    | <i>Campylobacterota</i>  | 0.084%             |
| 8    | <i>Thermoplasmata</i>    | 0.049%             |
| 9    | <i>Euryarchaeota</i>     | 0.010%             |
| 10   | <i>Verrucomicrobiota</i> | 0.008%             |

**Table S6.** Taxonomic relative abundances of the FMT inoculum at the genus level.

| Rank | Genus                                | Relative abundance |
|------|--------------------------------------|--------------------|
| 1    | <i>Faecalibacterium</i>              | 10.15%             |
| 2    | <i>Lachnospiraceae(f)</i>            | 9.11%              |
| 3    | <i>Bacteroides</i>                   | 8.82%              |
| 4    | <i>Lactobacillus</i>                 | 7.47%              |
| 5    | <i>Phascolarctobacterium</i>         | 6.81%              |
| 6    | <i>Ruminococcus_torques_group</i>    | 5.06%              |
| 7    | <i>Clostridia_UCG.014</i>            | 4.02%              |
| 8    | UCG.005                              | 3.72%              |
| 9    | <i>Blautia</i>                       | 2.99%              |
| 10   | <i>Subdoligranulum</i>               | 2.85%              |
| 11   | <i>Gastranaerophilales</i>           | 2.77%              |
| 12   | <i>Clostridia_vadinBB60_group</i>    | 2.76%              |
| 13   | <i>Christensenellaceae_R.7_group</i> | 2.57%              |
| 14   | <i>Alistipes</i>                     | 2.41%              |
| 15   | <i>Oscillospiraceae(f)</i>           | 2.18%              |
| 16   | Other                                | 26.31%             |

**Table S7.** ANCOM test results for differentially abundant phyla between the FMT group and the control group for FMT trial 1.

| Phylum                  | Abundances 50%<br>Control | Abundances 50%<br>FMT | W* | Change<br>FMT vs. Control |
|-------------------------|---------------------------|-----------------------|----|---------------------------|
| <i>Actinobacteriota</i> | 125.5                     | 11.5                  | 8  | Decreased                 |
| <i>Firmicutes</i>       | 72747.5                   | 47668.5               | 8  | Decreased                 |
| <i>Cyanobacteria</i>    | 1.0                       | 2167.0                | 8  | Increased                 |

\* The ANCOM results for phyla differed significantly in abundance levels between groups. High W values indicate significant differences in abundance levels between groups. The higher the W value, the greater the differences in abundance levels between groups. Fifty percentile abundances of features by the group are also listed. The higher the value, the more abundant the taxon.

**Table S8.** ANCOM test results for differentially abundant phyla between the FMT group and the control group for FMT trial 2.

| Phylum                  | Abundances 50%<br>Control | Abundances 50%<br>FMT | W* | Change<br>FMT vs. Control |
|-------------------------|---------------------------|-----------------------|----|---------------------------|
| <i>Actinobacteriota</i> | 20.0                      | 11.5                  | 8  | Decreased                 |
| <i>Firmicutes</i>       | 36578.0                   | 33204.5               | 8  | Decreased                 |
| <i>Desulfobacterota</i> | 1.0                       | 650.5                 | 8  | Increased                 |

\* The ANCOM results for phyla differed significantly in abundance levels between groups. High W values indicate significant differences in abundance levels between groups. The higher the W value, the greater the differences in abundance levels between groups. Fifty percentile abundances of features by the group are also listed. The higher the value, the more abundant the taxon.
